# Supplementary material for: Environmental variables affecting the distribution of POPs on Mt. Meru, Tanzania
Source: Royal Society of Chemistry journal article supplement (doi:10.1039/c3em00153a), 2013-01-01
Supplement: c3em00153a.xlsx [file c3em00153a.xlsx]

## Sheet: Foglio1
Supplementary table 1. Geographical, Vegetation and Pedological parameters of every sample.
Sample	Coordinates		Altitude	Exposition	Slope	Vegetation Category	Vegetation cover (%)				Sampling Depth	Soil type (WRB)	BD	pH H2O	TOC	tot N	C/N
	Lat.	Long.	m a.s.l.		%		Grass	Shrubs	Trees	Total	cm		g cm-3		%	%
1	-3.17011	36.7655	2351	N	80	Crops	50	0	0	50	0-10	Melanic Andosol	0.863043	5.92	9.50839	0.737005	12.9014
2	-3.16142	36.774	2090	NNE	40	Crops	60	0	0	60	0-10	Andic Cambisol	0.957746	6.35	4.95605	0.416668	11.8945
3	-3.15719	36.7786	1965	-	0	Crops	70	0	0	70	0-10	Haplic Cambisol	1.10526	6.96	3.66199	0.310206	11.805
4	-3.14555	36.7937	2108	-	0	Pasture	90	0	0	90	0-10	Mollic Leptosol	0.970455	6.42	5.75916	0.49747	11.5769
5	-3.1412	36.796	1891	NE	100	Pasture	90	10	0	100	0-10	Haplic Cambisol	1.03784	6.94	3.54569	0.266091	13.3251
6	-3.13822	36.798	1684	N	30	Pasture	60	30	10	100	0-10	Haplic Cambisol	1.12771	7.32	2.52267	0.23005	10.9658
7	-3.24796	36.8384	1756	E	20	Forest	100	50	100	250	0-5	Andic Cambisol	0.816129	6.21	10.8672	1.03516	10.4981
8	-3.24294	36.8207	2018	ENE	20	Forest	80	70	10	160	0-5	Andic Cambisol	0.886047	5.94	8.07226	0.757076	10.6624
9	-3.2327	36.8111	2279	ESE	15	Forest	90	70	80	240	0-5	Melanic Andosol	0.510345	5.83	16.789	1.31528	12.7646
9 bis	-3.22855	36.7994	2517	SE	50	Forest	100	30	0	130	0-5	Melanic Andosol	0.684615	6.08	15.0846	1.2008	12.5621
10	-3.22597	36.7936	2745	ESE	50	Forest	100	50	10	160	0-5	Melanic Andosol	0.709302	5.79	17.5287	1.53571	11.4141
11	-3.22464	36.7864	3057	ESE	60	Forest	100	60	50	210	0-5	Melanic Andosol	0.56044	5.52	14.7556	1.27641	11.5602
12	-3.22037	36.7798	3325	ESE	50	Shrubs	50	90	0	140	0-5	Andic Cambisol	0.935	6.28	5.98392	0.407972	14.6675
13	-3.2177	36.7726	3581	-	0-2	Shrubs	40	30	0	70	0-5	Vitric Cambisol	1.03333	6.15	4.28474	0.316855	13.5227
14	-3.24359	36.7498	4577	O	80	Rocks	5	0	0	5	0-3	Nudilithic Leptosol	1.35429	6	1.50399	0.122932	12.2344
15	-3.23347	36.7487	4263	NO	90	Rocks	7	0	0	7	0-5	Haplic Regosol (Tephric)	1.5	6.4	0.161988	0.012	13.7
16	-3.22625	36.7548	4027	N	80	Rocks	10	0	0	10	0-4	Haplic Regosol (Tephric)	1.5	6.93	0.181662	0.013	13.5
17	-3.22154	36.7652	3838	NNE	80	Rocks	25	0	0	25	0-5	Lithic Leptosol (Tephric)	1.04706	5.89	1.33499	0.0907894	14.7043
18	-3.2224	36.8578	1535	-	0	Shrubs	90	60	10	160	0-5	Haplic Fluvisol	1.06	6.59	8.21988	0.708102	11.6083
19	-3.13143	36.8041	1571	SE	2	Shrubs	50	20	10	80	0-5	Endosalic Cambisol	1.09355	7.41	2.44834	0.187426	13.063
20	-3.12789	36.8115	1550	-	0	Crops	100	0	0	100	0-5	Haplic Fluvisol	1.1275	6.93	3.23214	0.263671	12.2582
