# Supplementary material for: Environmental variables affecting the distribution of POPs on Mt. Meru, Tanzania
Source: Royal Society of Chemistry journal article supplement (doi:10.1039/c3em00153a), 2013-01-01
Supplement: c3em00153a_2.xlsx [file c3em00153a_2.xlsx]

## Sheet: Foglio1
Supplementary Table 2: Concentration values detected in every sample for each individual compound. Data are expressed in ng/g od dry weight in the top table and in ng/g of organic matter in the bottom table.
<LOQ = the concentration detected was lower than the Limit Of Quantification.
Sample	CB18	CB31+28	CB52	CB44	CB101	CB149	CB118	CB153	CB138	CB180	CB170	CB194	∑PCBs	o,p'-DDE	p,p'-DDE	o,p'-DDD	p,p'-DDD	o,p'-DDT	p,p'-DDT	∑DDX	α-HCH	β-HCH	γ-HCH	δ-HCH	∑HCH	HCB
ng/g d.w.
1	0.020619	0.0456331	0.00972508	0.0104732	0.0258089	0.0393211	0.0151019	0.100804	0.0557789	0.0445577	0.0421264	0.0157097	0.425659	0.0116972	1.2274	< LOQ	0.0039464	< LOQ	< LOQ	1.24305	0.0287795	0.0232524	0.0334331	0.0116595	0.0971245	0.0213342
2	0.0178571	0.0234942	0.0103284	0.00923123	0.0258777	0.0323093	0.0407839	0.108051	0.0522851	0.0517933	0.0255751	0.00684776	0.404434	0.0137508	5.14636	< LOQ	0.00291822	0.00842916	0.0187728	5.19023	0.0103164	0.0114801	0.0623564	0.00690925	0.0910622	0.0127674
3	0.0197142	0.0194496	0.00664858	0.00740937	0.0180603	0.0314898	0.0248743	0.0461762	0.0374438	0.0416777	0.0260651	0.0112464	0.290255	0.0075627	0.465305	< LOQ	0.00158709	0.000794625	0.0020264	0.477276	0.00516044	0.0325296	0.0223445	< LOQ	0.0600345	0.00597463
4	0.0365109	0.0197119	0.0102949	0.00786082	0.0239815	0.031962	0.0280915	0.0689518	0.0404613	0.0428155	0.033598	0.00714257	0.351383	0.0129717	0.926136	< LOQ	0.00836536	0.00209008	0.000237033	0.949801	0.00868034	0.0343679	< LOQ	0.0131695	0.0562177	0.0161427
5	0.0162519	0.0370669	0.0159711	0.0114079	0.0272035	0.0401207	0.0368914	0.079715	0.0698515	0.0457018	0.0301169	0.00333462	0.413633	0.0108869	1.89665	0.00152511	0.00702483	0.000570642	0.00151072	1.91817	0.021231	0.00933348	0.016672	0.0094032	0.0566397	0.0504225
6	0.0165983	0.0346194	0.0157893	0.0123302	0.0298212	0.028538	0.0335314	0.0926716	0.0641337	0.0481491	0.0117444	0.00371021	0.391637	0.00782605	1.73011	< LOQ	0.0109037	0.00225096	0.00338067	1.75447	0.00994769	0.02176	0.0112166	0.00351954	0.0464437	0.0157501
7	0.0191675	0.0160007	0.0578774	0.0204175	0.080295	0.0735031	0.039835	0.144131	0.0834618	0.103838	0.0227926	0.00458352	0.665903	0.0071773	0.911866	< LOQ	0.00776746	0.000786143	0.000767841	0.928365	0.0168677	0.00600613	0.012039	0.00525163	0.0401644	0.0360148
8	0.0207002	0.0148896	0.098344	0.0383498	0.169596	0.157103	0.0923881	0.373983	0.265398	0.165383	0.0387856	0.00334108	1.43826	0.012504	3.17299	0.00158374	0.00387483	0.00180393	0.0123032	3.20506	0.0144793	< LOQ	0.00479452	0.0246827	0.0439565	0.0657919
9	0.132857	0.0247525	0.156689	0.0751784	0.236818	0.134815	0.0826618	0.298181	0.201128	0.202855	0.0541101	0.00690767	1.60695	0.0107226	1.89638	0.00376134	0.0186211	< LOQ	0.00668591	1.93617	0.0490662	0.0422043	0.0133019	0.00977501	0.114347	0.108772
9 bis	0.163733	0.0245907	0.0254492	0.0139204	0.0818667	0.0582572	0.0561722	0.16171	0.116576	0.090452	0.0360581	0.00392469	0.83271	0.0104714	2.41343	0.00378707	0.0149149	0.00372605	0.00832021	2.45465	0.0169689	0.0186606	0.104461	< LOQ	0.140091	0.0549942
10	0.0337102	0.00211657	0.0229725	0.0114088	0.0422797	0.0362914	0.0178101	0.0738733	0.0410407	0.039905	0.0205978	0.00258118	0.344587	0.0106901	0.993784	< LOQ	0.00245386	0.00108848	0.00243025	1.01045	0.0207393	0.00910149	0.00449361	0.0585022	0.0928366	0.0809834
11	0.0235825	0.00238416	0.0307349	0.0186587	0.0484088	0.0497046	0.0256556	0.10537	0.0429667	0.0534363	0.0187623	0.00181404	0.421478	0.00550664	0.943627	0.00181061	0.00228638	< LOQ	< LOQ	0.953231	0.0127065	0.0108376	0.0119145	0.0764508	0.111909	0.108379
12	0.0416845	0.0182814	0.0421468	0.0255726	0.0655854	0.0553066	0.0311211	0.123915	0.0685019	0.0570494	0.0132665	0.000782473	0.543214	0.00843429	1.44569	0.00235907	0.00392576	0.00289107	0.010917	1.47422	0.0203497	0.00453988	0.015232	0.0113648	0.0514863	0.0090549
13	0.0473312	0.0696047	0.0183537	0.0137744	0.0420193	0.0233359	0.0271458	0.0792028	0.0419094	0.0302597	0.00912188	0.00109902	0.403158	0.0148136	1.85112	< LOQ	0.0106314	0.00320113	0.00206217	1.88183	< LOQ	< LOQ	< LOQ	< LOQ	< LOQ	< LOQ
14	0.0806754	0.0391968	0.013691	0.00608488	0.0247959	0.0173419	0.0209421	0.0671366	0.0386897	0.0382841	0.0143502	0.00299173	0.36418	0.00831608	1.506	0.00268001	0.0135903	0.00929679	0.0214552	1.56134	0.00737147	0.00704011	0.113825	0.0229166	0.151153	0.0253579
15	0.0198577	0.0070156	0.00796686	0.00233853	0.019501	0.0122476	0.0143285	0.0450267	0.0243168	0.0225926	0.00794705	0.00105036	0.184189	0.0100721	0.811505	< LOQ	0.00568552	0.00222296	0.00429131	0.833777	0.00656701	0.0176685	0.0283907	0.0234291	0.0760554	0.0319619
16	0.0228755	0.0114779	0.0251028	0.0116585	0.0445671	0.039992	0.0237183	0.0873683	0.0658573	0.0858834	0.019384	0.00196649	0.439852	0.00346785	0.813544	< LOQ	0.00768892	< LOQ	0.00116617	0.825867	0.00495701	0.00771185	0.0814979	0.000420989	0.0945878	0.0149684
17	0.0459974	0.0427319	0.0363874	0.0230453	0.0650774	0.0349412	0.0123157	0.0683896	0.054861	0.0735212	0.0189401	0.00536481	0.481573	0.00639889	0.869293	0.000992094	0.00277482	0.000238085	0.000998872	0.880695	< LOQ	0.0289362	0.0340099	0.0364839	0.09943	0.0709694
18	0.0197301	0.023498	0.0308625	0.0099678	0.0384668	0.0296294	0.0151058	0.0532301	0.0355553	0.0481606	0.0211345	0.00130164	0.326642	0.00407974	0.814378	< LOQ	0.00714948	0.00262433	0.0067261	0.834957	< LOQ	< LOQ	< LOQ	< LOQ	< LOQ	< LOQ
19	0.00719836	0.00585287	0.0119076	0.00487739	0.0173568	0.0142622	0.012143	0.0533822	0.0290289	0.0200814	0.00228733	0.000538195	0.178916	0.00937276	0.980319	< LOQ	0.00258802	0.000809841	0.00234226	0.995432	0.0165	0.0852242	0.081723	0.0168692	0.200316	0.0431371
20	0.0183748	0.00732052	0.0111131	0.00576233	0.0195802	0.0151996	0.0109661	0.0257247	0.0133768	0.013612	0.00570353	0.001	0.147734	0.00610595	0.383424	0.00161371	0.00208889	0.00126997	0.00573461	0.400237	< LOQ	< LOQ	< LOQ	< LOQ	< LOQ	< LOQ
Sample	CB18	CB31+28	CB52	CB44	CB101	CB149	CB118	CB153	CB138	CB180	CB170	CB194	∑PCBs	o,p'-DDE	p,p'-DDE	o,p'-DDD	p,p'-DDD	o,p'-DDT	p,p'-DDT	∑DDX	α-HCH	β-HCH	γ-HCH	δ-HCH	∑HCH	HCB
ng/g OM
1	0.125762	0.278331	0.0593165	0.0638793	0.157417	0.239833	0.0921117	0.614838	0.340214	0.271772	0.256943	0.0958189	2.59624	0.0713452	7.48635	< LOQ	0.0240704	< LOQ	< LOQ	7.58176	0.175538	0.141826	0.203922	0.0711163	0.592403	0.130126
2	0.20883	0.274753	0.120785	0.107955	0.302627	0.377841	0.476947	1.2636	0.611447	0.605696	0.299087	0.080081	4.72965	0.160808	60.184	< LOQ	0.0341271	0.0985747	0.219538	60.6971	0.120646	0.134255	0.729229	0.0808004	1.06493	0.149309
3	0.312436	0.308242	0.105369	0.117426	0.286225	0.499059	0.394215	0.731813	0.593419	0.660519	0.413086	0.178235	4.60004	0.119856	7.37428	< LOQ	0.0251527	0.0125934	0.0321149	7.56399	0.0817819	0.515524	0.354113	< LOQ	0.951419	0.0946852
4	0.367674	0.198504	0.103672	0.0791604	0.2415	0.321865	0.282888	0.694361	0.407455	0.431163	0.33834	0.0719275	3.53851	0.130628	9.32643	< LOQ	0.0842413	0.0210476	0.00238698	9.56473	0.0874153	0.346102	< LOQ	0.132623	0.56614	0.162565
5	0.265545	0.605649	0.260957	0.186398	0.444487	0.655546	0.602781	1.30249	1.14133	0.746738	0.49209	0.0544855	6.75849	0.177884	30.9901	0.0249194	0.114781	0.00932392	0.0246842	31.3417	0.346912	0.152508	0.272418	0.153647	0.925486	0.823897
6	0.382055	0.796858	0.363434	0.283813	0.686416	0.656878	0.771816	2.13309	1.47621	1.10828	0.270328	0.0854006	9.01458	0.180138	39.8232	< LOQ	0.250978	0.051812	0.0778154	40.3839	0.228998	0.50092	0.258208	0.0810206	1.06915	0.362572
7	0.102282	0.085383	0.308846	0.108952	0.428471	0.392228	0.212568	0.769114	0.44537	0.5541	0.121626	0.0244587	3.5534	0.0382996	4.86591	< LOQ	0.0414488	0.00419503	0.00409736	4.95395	0.0900089	0.0320498	0.0642423	0.0280236	0.214325	0.192182
8	0.148786	0.107022	0.706866	0.275646	1.219	1.12921	0.664057	2.68807	1.9076	1.18872	0.278779	0.0240146	10.3378	0.089875	22.8065	0.0113834	0.0278511	0.0129661	0.0884315	23.037	0.10407	< LOQ	0.0344607	0.177408	0.315938	0.472881
9	0.458985	0.0855127	0.541315	0.25972	0.818138	0.465746	0.285573	1.03013	0.69484	0.700807	0.186935	0.023864	5.55156	0.0370434	6.55144	0.0129944	0.0643307	< LOQ	0.0230979	6.6889	0.169509	0.145803	0.0459541	0.0337698	0.395037	0.375776
9 bis	0.629794	0.0945871	0.0978893	0.0535443	0.314897	0.224084	0.216064	0.62201	0.448404	0.34792	0.138696	0.0150962	3.20299	0.040278	9.28317	0.0145668	0.0573694	0.0143321	0.0320034	9.44172	0.0652701	0.0717769	0.401804	< LOQ	0.538851	0.211532
10	0.111543	0.00700346	0.0760132	0.0377504	0.139898	0.120084	0.0589316	0.244438	0.135799	0.132041	0.0681556	0.0085408	1.1402	0.0353722	3.28831	< LOQ	0.00811952	0.00360165	0.00804142	3.34345	0.0686232	0.0301155	0.0148687	0.193575	0.307182	0.267962
11	0.0926756	0.0093694	0.120784	0.0733258	0.19024	0.195332	0.100823	0.414087	0.168853	0.209997	0.0737331	0.00712889	1.65635	0.0216403	3.70832	0.00711543	0.00898513	< LOQ	< LOQ	3.74606	0.0499351	0.0425904	0.0468226	0.300443	0.439791	0.425918
12	0.40433	0.177325	0.408815	0.248049	0.636164	0.536461	0.301867	1.20195	0.664453	0.553366	0.128682	0.00758981	5.26905	0.0818107	14.0229	0.0228824	0.0380789	0.0280427	0.105892	14.2996	0.197378	0.0440337	0.14774	0.110231	0.499383	0.0878264
13	0.641456	0.943317	0.248738	0.186677	0.569466	0.316259	0.367894	1.0734	0.567976	0.410095	0.123624	0.0148945	5.46379	0.200761	25.0873	< LOQ	0.144082	0.0433833	0.0279475	25.5035	< LOQ	< LOQ	< LOQ	< LOQ	< LOQ	< LOQ
14	3.1197	1.51573	0.529427	0.235301	0.958852	0.670608	0.809828	2.59615	1.49612	1.48044	0.554918	0.11569	14.0828	0.321581	58.2366	0.103635	0.525532	0.359504	0.829669	60.3765	0.285053	0.272239	4.40158	0.886179	5.84505	0.980582
15	7.19899	2.54336	2.88822	0.847786	7.06967	4.4401	5.19448	16.3235	8.81554	8.19047	2.88103	0.380785	66.7739	3.65144	294.194	< LOQ	2.06117	0.805888	1.55572	302.268	2.37935	6.40165	10.2865	8.48882	27.5563	11.5804
16	7.37158	3.69872	8.08934	3.75692	14.3616	12.8873	7.64317	28.1543	21.2224	27.6758	6.24644	0.633697	141.741	1.11751	262.163	< LOQ	2.47774	< LOQ	0.375797	266.134	1.59904	2.48769	26.2897	0.135803	30.5122	4.82853
17	2.00606	1.86364	1.58695	1.00507	2.83819	1.52387	0.53712	2.98264	2.39263	3.20644	0.826025	0.233973	21.0026	0.279071	37.912	0.0432677	0.121017	0.0103835	0.0435633	38.4093	< LOQ	1.26194	1.4832	1.5911	4.33624	3.09505
18	0.139226	0.165814	0.217782	0.070338	0.271442	0.20908	0.106595	0.37562	0.250897	0.339846	0.149136	0.00918504	2.30496	0.0287888	5.74668	< LOQ	0.0504505	0.0185187	0.0474629	5.8919	< LOQ	< LOQ	< LOQ	< LOQ	< LOQ	< LOQ
19	0.170424	0.138569	0.281916	0.115474	0.410928	0.337662	0.287491	1.26384	0.68727	0.475434	0.0541533	0.012742	4.23591	0.221903	23.2094	< LOQ	0.0612723	0.0191733	0.0554538	23.5672	0.390624	2.01762	1.93473	0.399366	4.74234	1.02124
20	0.329976	0.131462	0.19957	0.103481	0.351623	0.272956	0.19693	0.461967	0.240223	0.244446	0.102425	0.00475166	2.63981	0.109651	6.88556	0.0289791	0.0375124	0.0228063	0.102983	7.18749	< LOQ	< LOQ	< LOQ	< LOQ	< LOQ	< LOQ
